# Supplementary figures and images for: Sex-Related Differences of Weight Bearing and Non-Weight Bearing Muscle Properties
Source: MDPI journal article supplement (doi:10.3390/muscles2040031), 2023-12-15

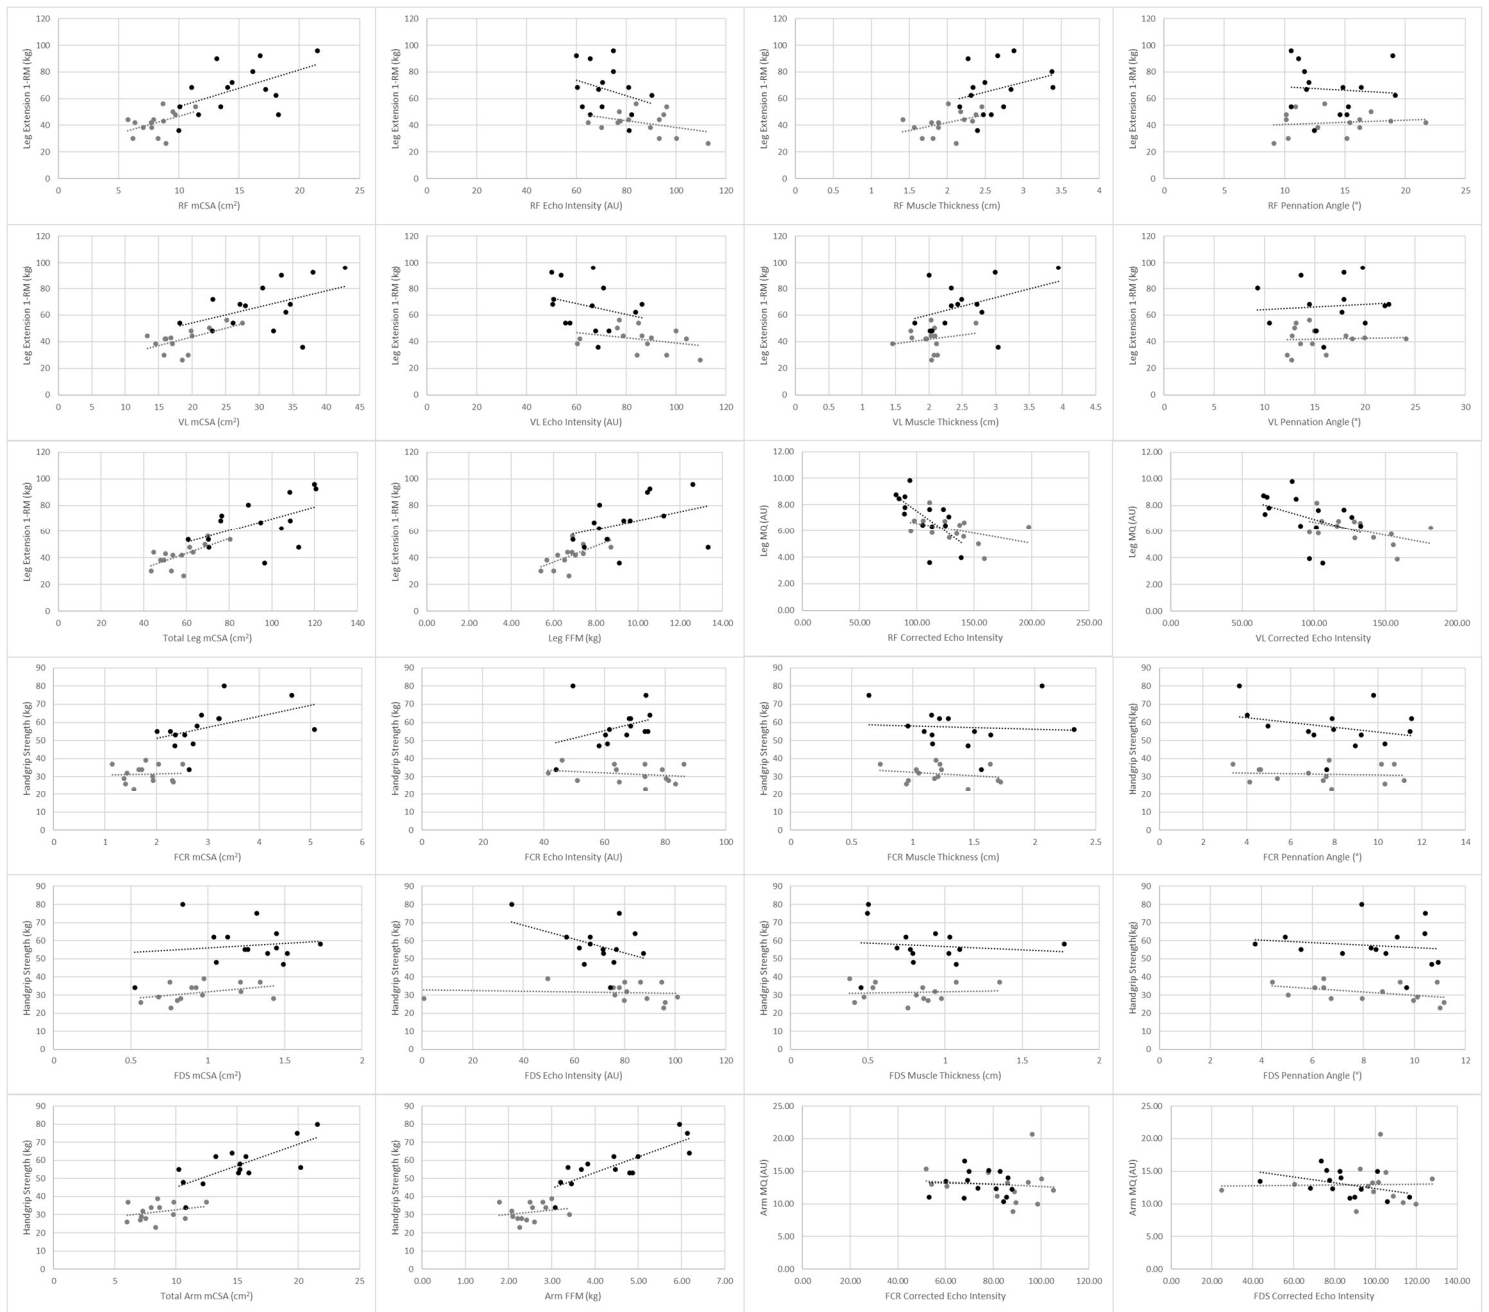

**Figure S1.** Pearson Correlation Graphs for all comparisons.

Supplement: s1 [file s1]
